# Supplementary material for: Ruminal microbiome-host crosstalk stimulates the development of the ruminal epithelium in a lamb model
Source: PubMed Central journal article supplement (PMC6547527; doi:10.1186/s40168-019-0701-y), 2019-06-03

**A**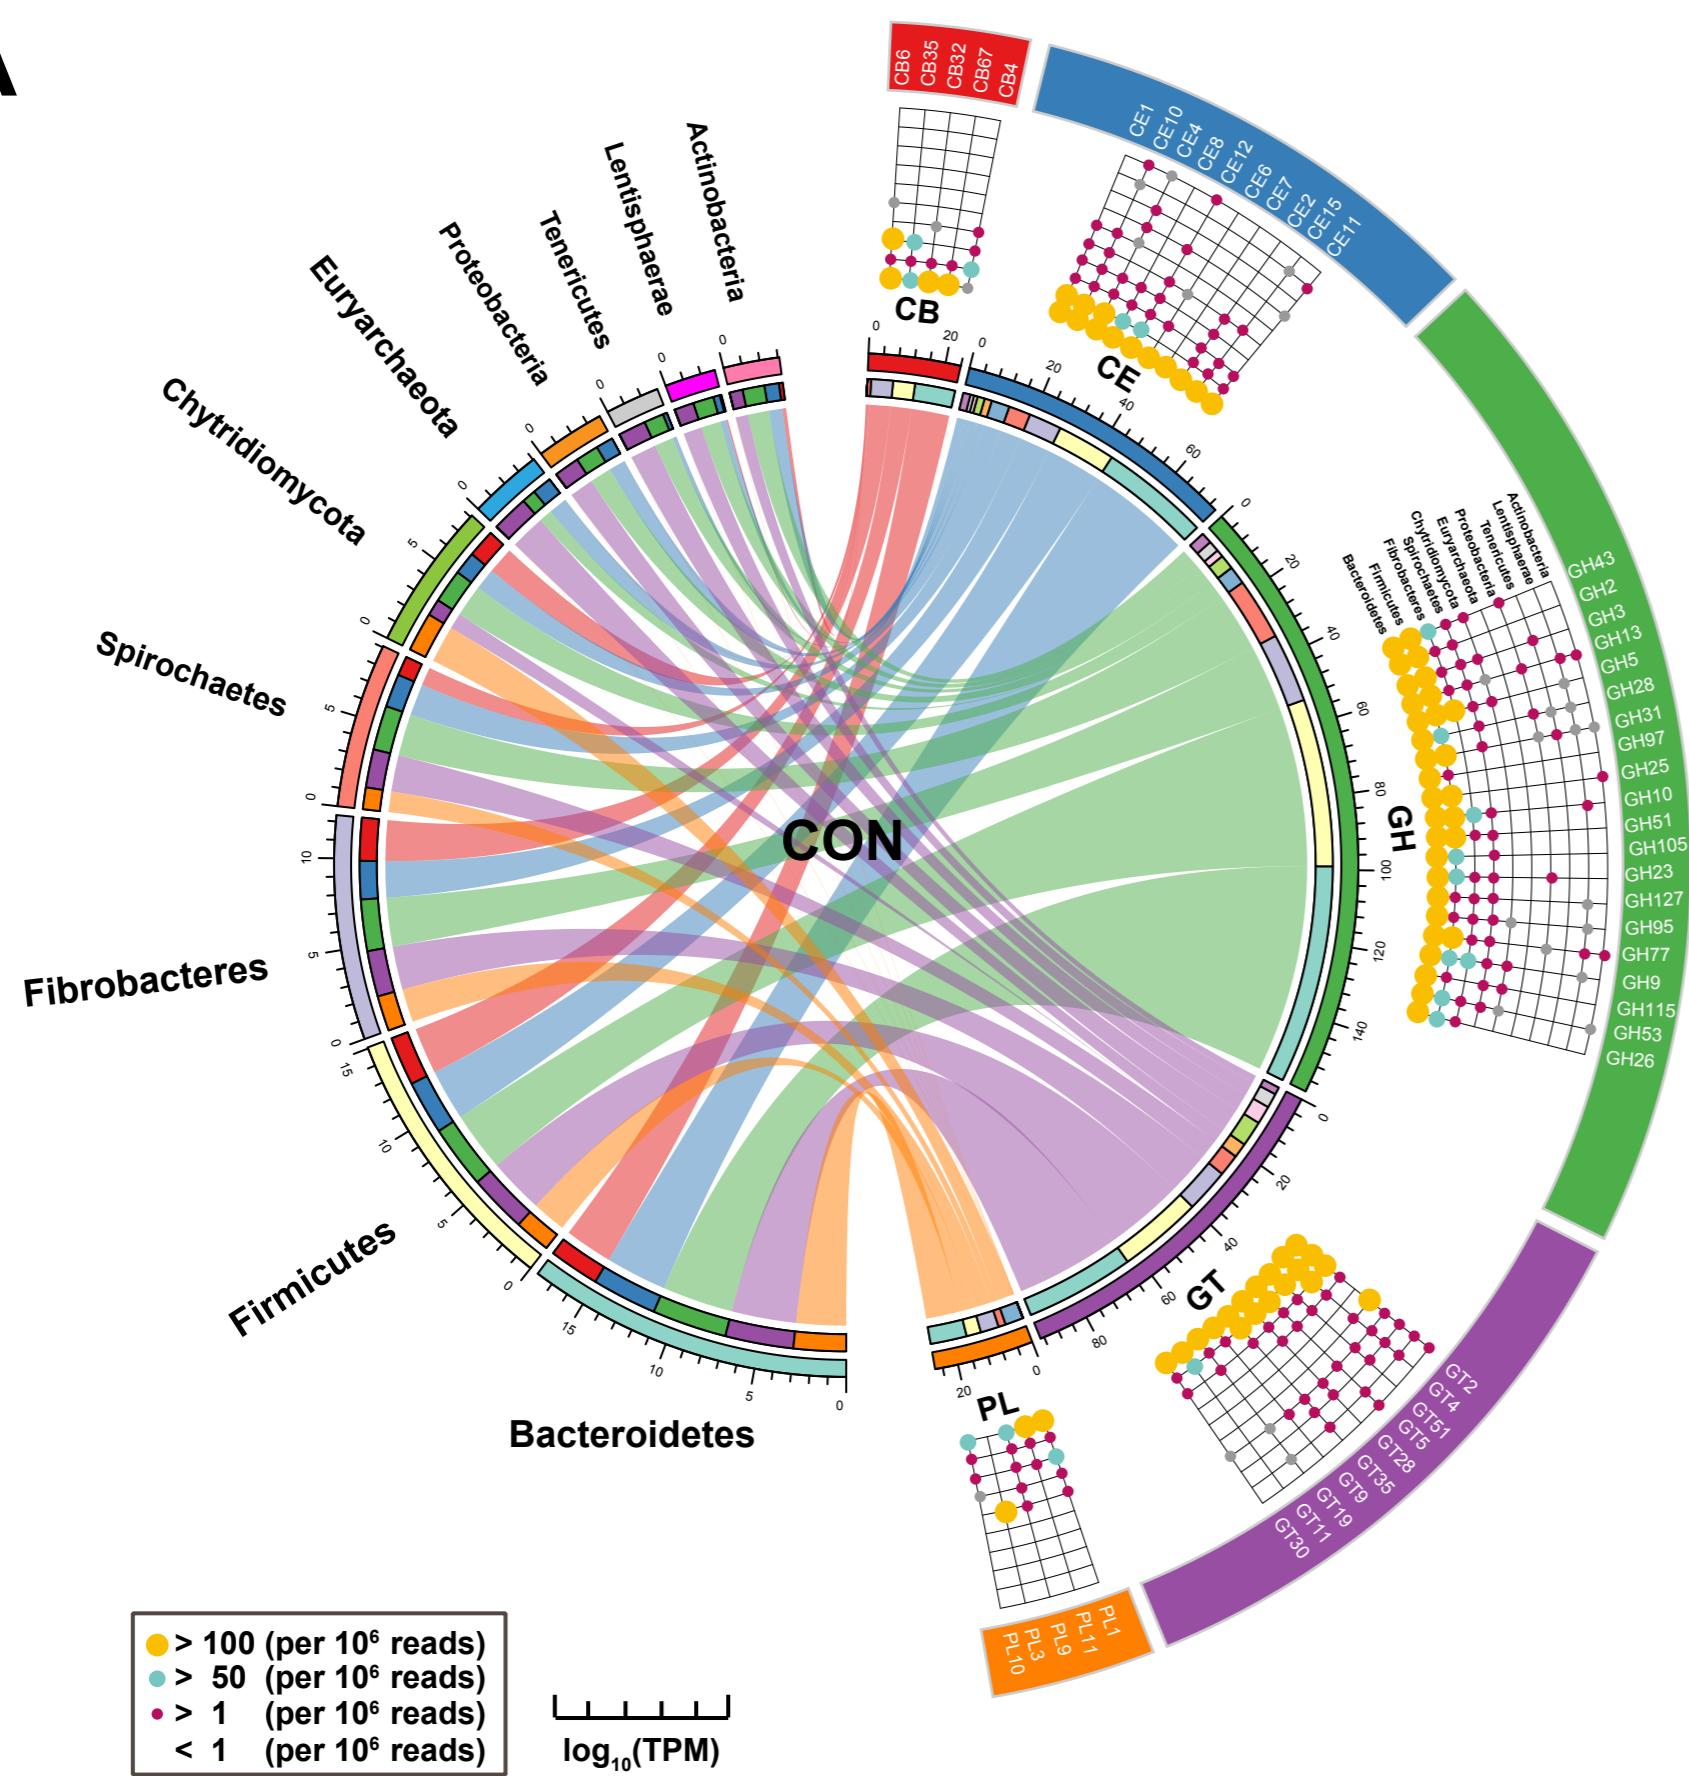**Phylum**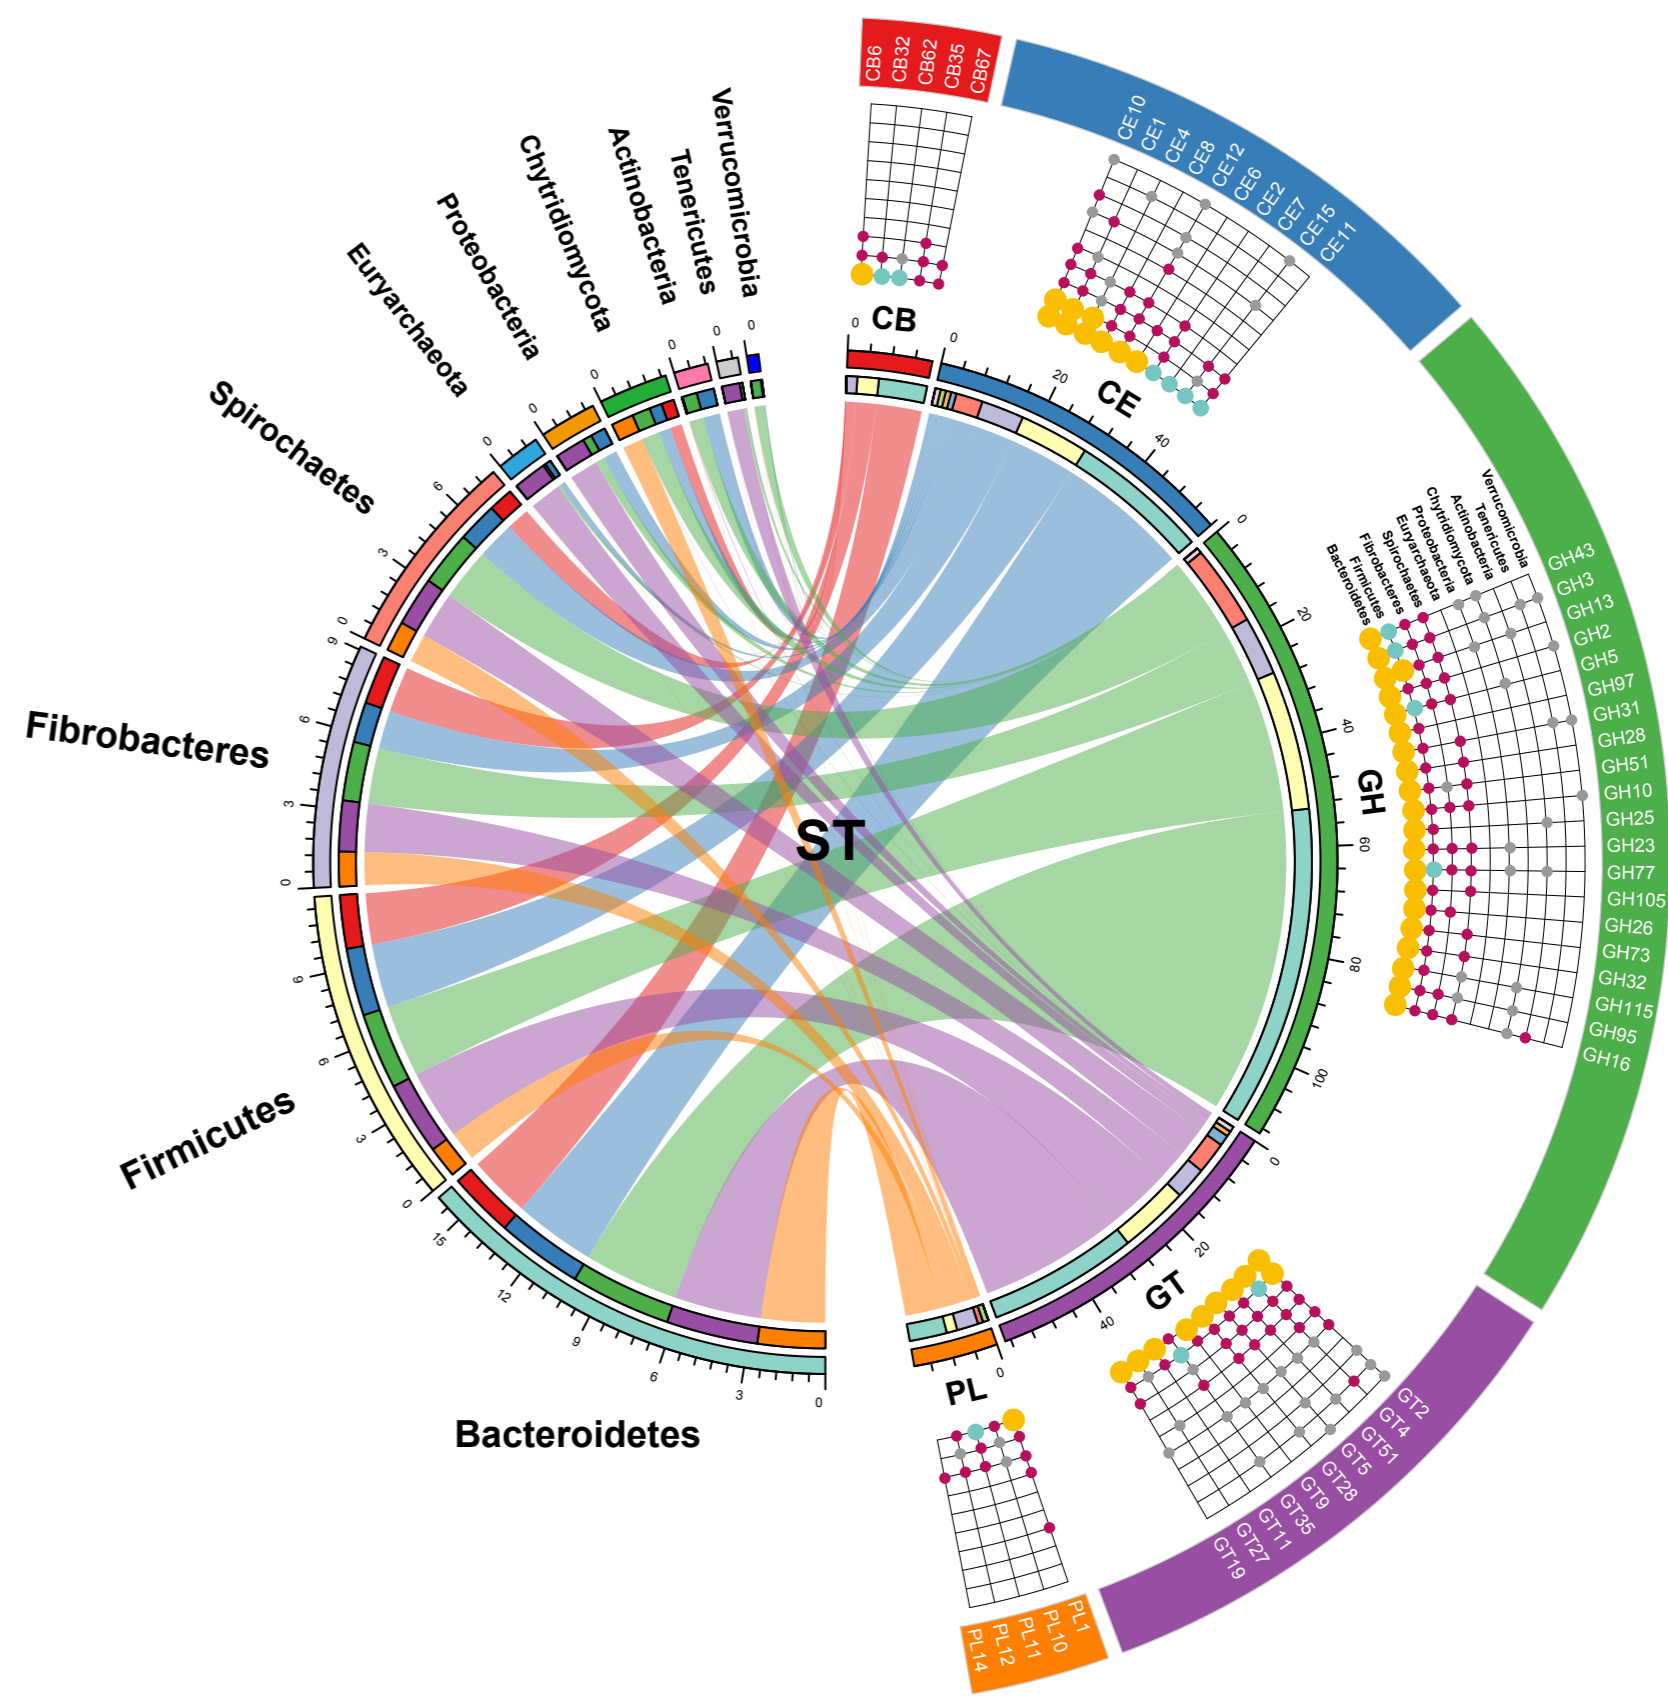**B**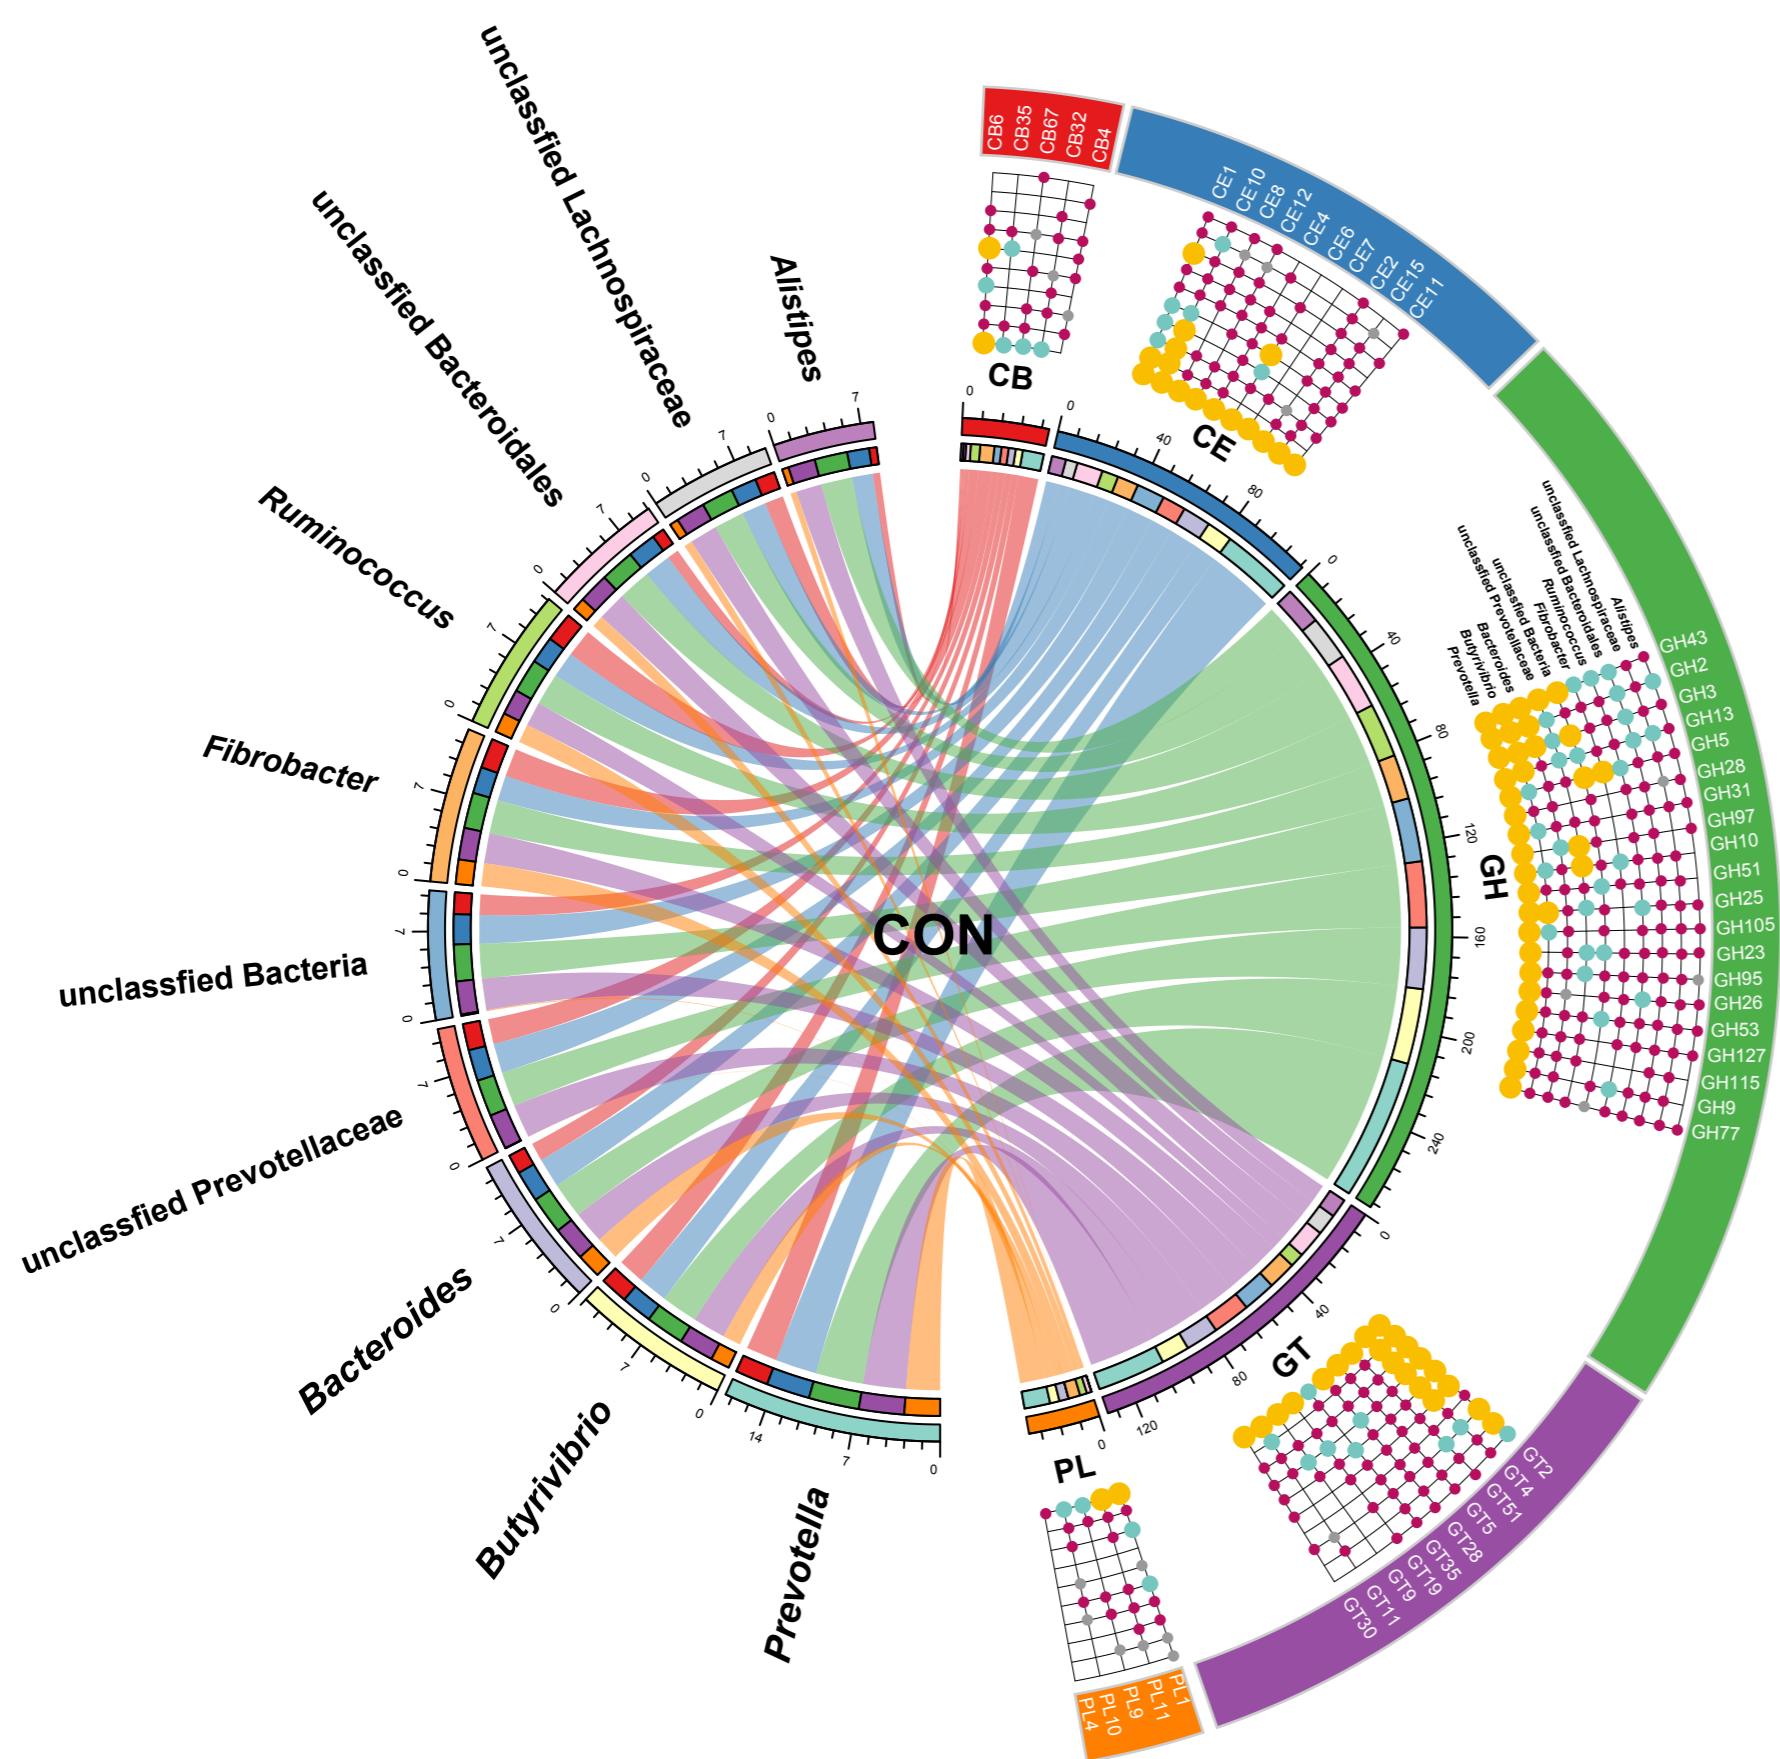**Genus**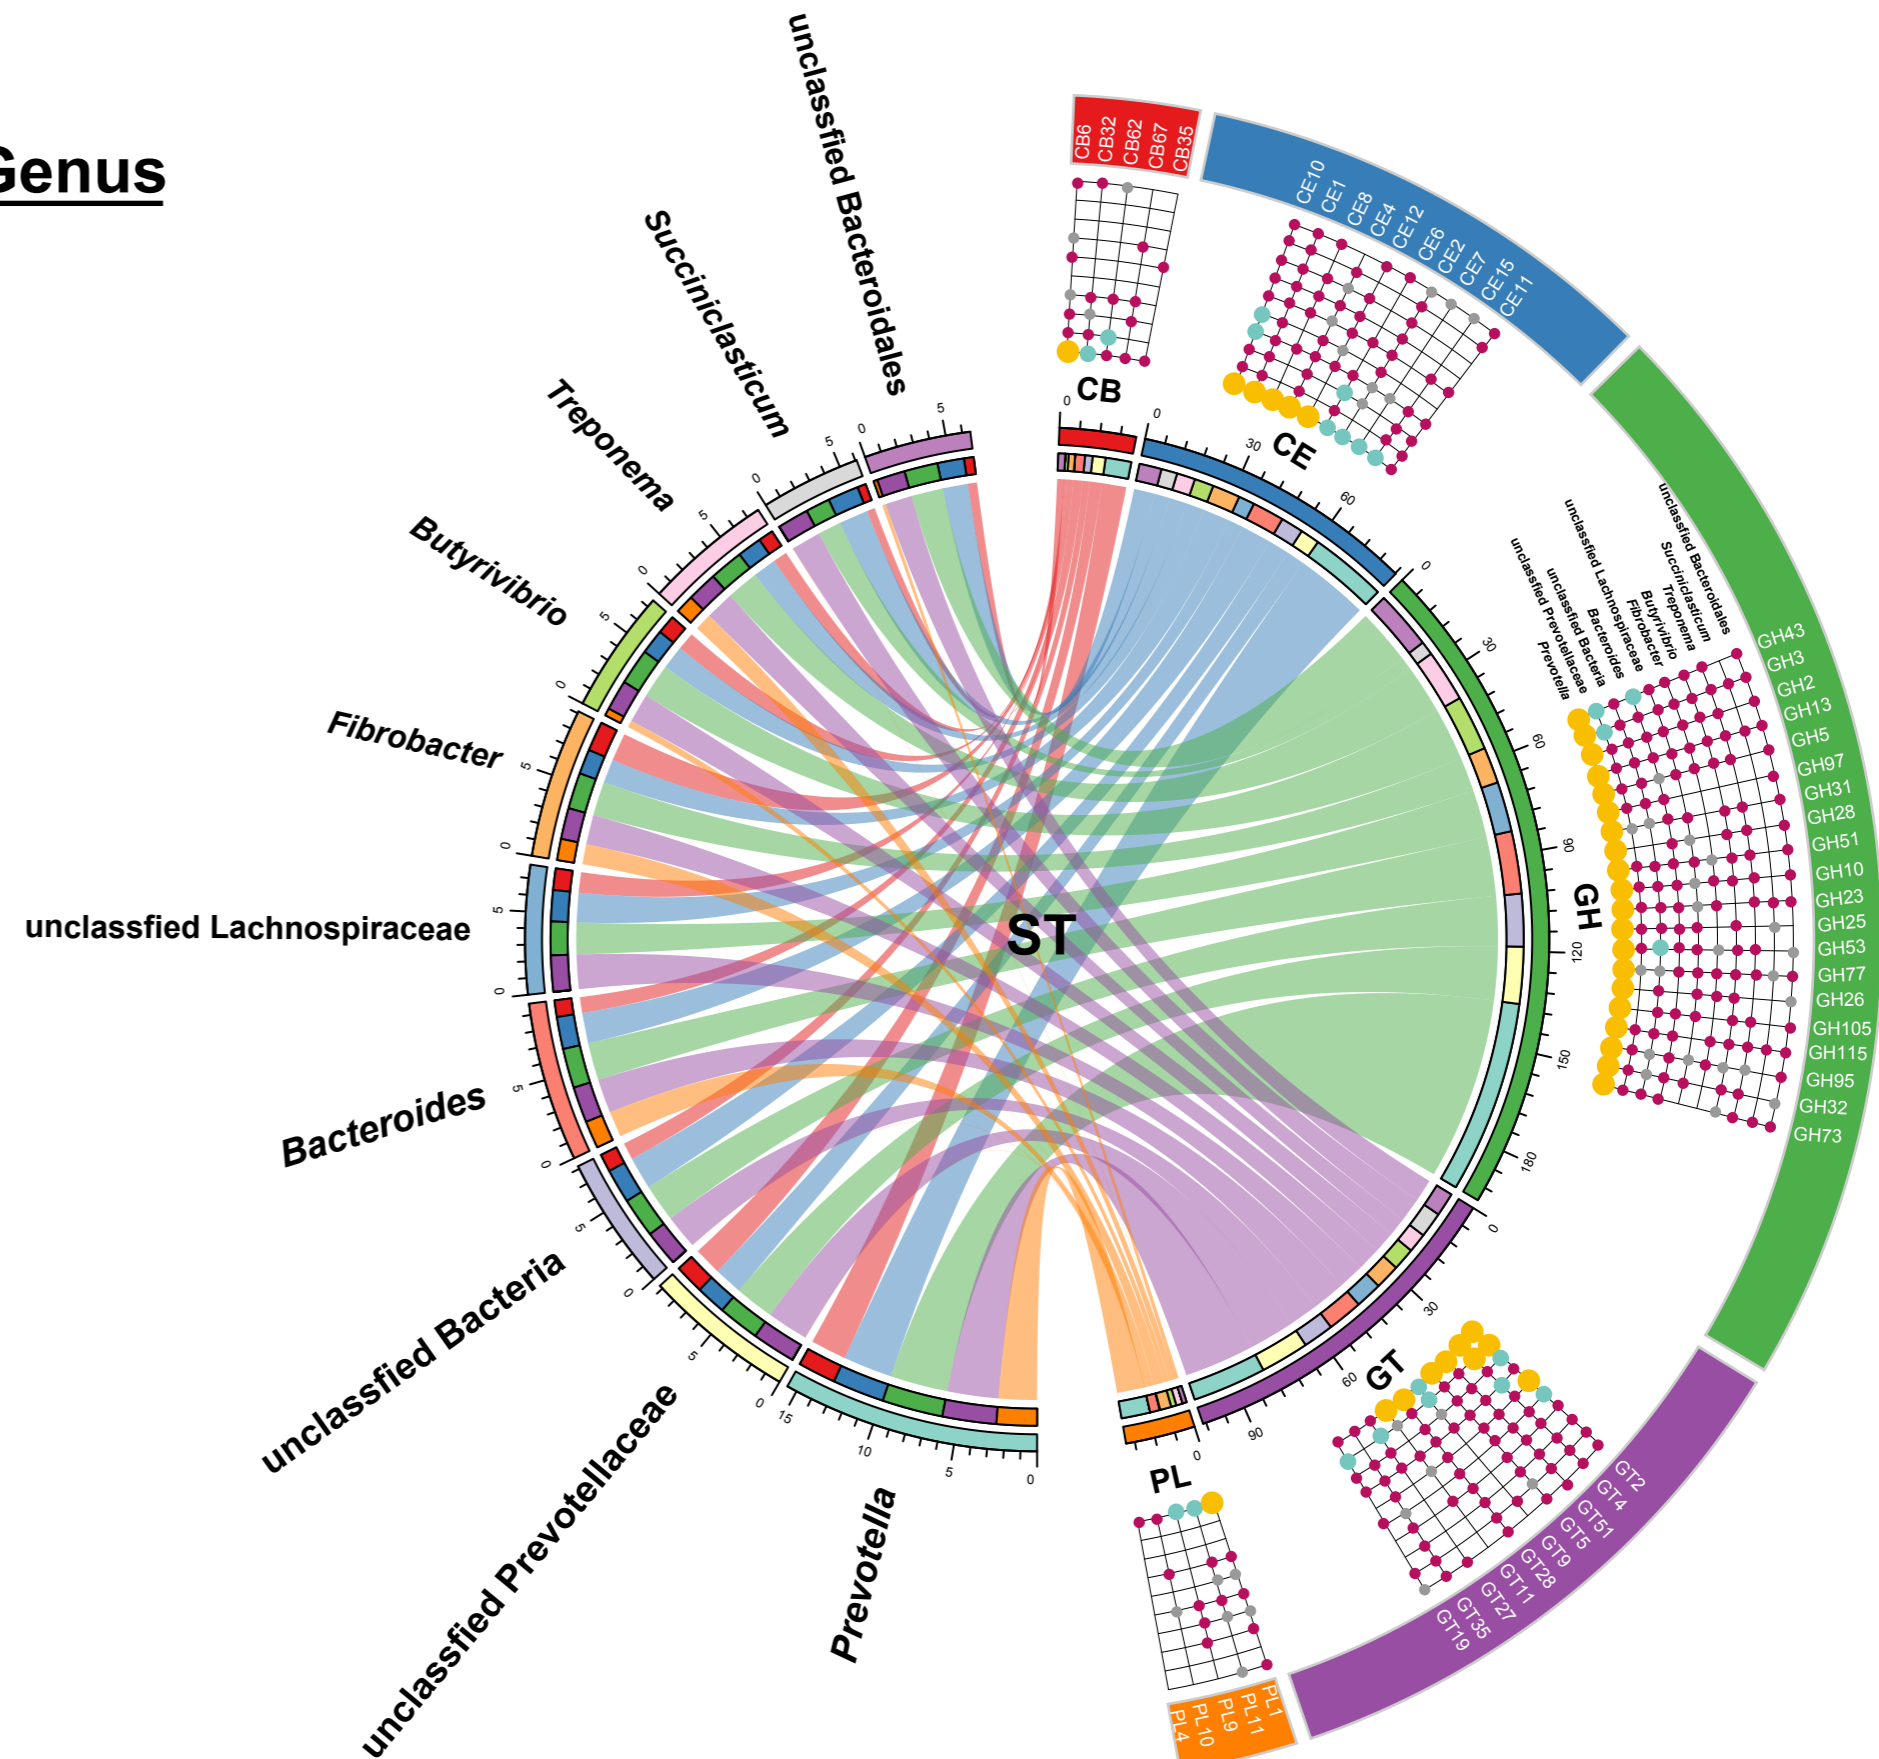

Supplement: 40168_2019_701_MOESM12_ESM.pdf [file 40168_2019_701_MOESM12_ESM.pdf]
